# Supplementary material for: Artificial Neural Network-Derived Cerebral Metabolic Rate of Oxygen for Differentiating Glioblastoma and Brain Metastasis in MRI: A Feasibility Study
Source: MDPI journal article supplement (doi:10.3390/app11219928), 2021-10-24
Supplement: s1 [file s1]

**Table S1. Oxygenation and perfusion parameters in CET and NET2 by individual patient**

| Patient #   | OEF [%]         |                 | CBF [ml/ 100g/ min] |                  | CMRO2 [ $\mu$ mol/ 100g/ min] |                   |
|-------------|-----------------|-----------------|---------------------|------------------|-------------------------------|-------------------|
|             | CET             | NET2            | CET                 | NET2             | CET                           | NET2              |
| <b>GBM</b>  |                 |                 |                     |                  |                               |                   |
| 1           | 41.3 $\pm$ 19.0 | 26.0 $\pm$ 13.7 | 97.7 $\pm$ 106.7    | 89.1 $\pm$ 100.4 | 305.5 $\pm$ 410.9             | 163.2 $\pm$ 208.9 |
| 2           | 39.7 $\pm$ 16.5 | 37.6 $\pm$ 10.1 | 48.7 $\pm$ 50.9     | 76.2 $\pm$ 36.7  | 147.3 $\pm$ 182.2             | 212.0 $\pm$ 119.7 |
| 3           | 39.7 $\pm$ 21.9 | 48.9 $\pm$ 14.1 | 40.8 $\pm$ 37.5     | 28.4 $\pm$ 20.8  | 116.7 $\pm$ 130.2             | 99.0 $\pm$ 82.7   |
| 4           | 32.8 $\pm$ 17.2 | 24.3 $\pm$ 14.1 | 27.7 $\pm$ 25.3     | 11.1 $\pm$ 13.9  | 69.9 $\pm$ 79.0               | 20.8 $\pm$ 33.1   |
| 5           | 38.0 $\pm$ 15.2 | 27.1 $\pm$ 8.3  | 33.6 $\pm$ 28.5     | 11.8 $\pm$ 12.4  | 97.4 $\pm$ 111.5              | 23.6 $\pm$ 26.4   |
| 6           | 27.5 $\pm$ 21.1 | 26.1 $\pm$ 14.3 | 47.8 $\pm$ 36.7     | 13.0 $\pm$ 12.8  | 107.9 $\pm$ 131.7             | 25.8 $\pm$ 32.2   |
| 7           | 34.6 $\pm$ 20.6 | 21.8 $\pm$ 11.4 | 59.1 $\pm$ 42.7     | 26.0 $\pm$ 19.2  | 153.2 $\pm$ 175.5             | 43.2 $\pm$ 46.9   |
| <b>cMET</b> |                 |                 |                     |                  |                               |                   |
| 1           | 43.3 $\pm$ 13.6 | 26.0 $\pm$ 12.2 | 51.2 $\pm$ 57.0     | 18.3 $\pm$ 20.9  | 162.3 $\pm$ 199.3             | 35.9 $\pm$ 50.1   |
| 2           | 43.0 $\pm$ 18.5 | 20.4 $\pm$ 15.1 | 55.0 $\pm$ 23.5     | 8.5 $\pm$ 12.0   | 171.9 $\pm$ 110.3             | 13.8 $\pm$ 30.7   |
| 3           | 32.3 $\pm$ 17.6 | 31.5 $\pm$ 15.5 | 63.4 $\pm$ 41.4     | 12.7 $\pm$ 13.2  | 155.3 $\pm$ 138.9             | 29.9 $\pm$ 39.3   |
| 4           | 45.8 $\pm$ 10.1 | 39.1 $\pm$ 7.5  | 53.7 $\pm$ 47.8     | 14.3 $\pm$ 14.9  | 173.4 $\pm$ 161.1             | 41.3 $\pm$ 42.5   |
| 5           | 55.4 $\pm$ 27.1 | 19.6 $\pm$ 13.5 | 98.5 $\pm$ 88.6     | 40.7 $\pm$ 38.1  | 425.9 $\pm$ 498.1             | 60.2 $\pm$ 100.7  |
| 6           | 38.2 $\pm$ 15.3 | 33.6 $\pm$ 12.0 | 48.3 $\pm$ 53.1     | 5.9 $\pm$ 16.9   | 131.0 $\pm$ 158.9             | 16.2 $\pm$ 49.9   |
| 7           | 43.2 $\pm$ 21.8 | 26.2 $\pm$ 17.9 | 52.4 $\pm$ 55.6     | 9.4 $\pm$ 13.0   | 173.5 $\pm$ 231.2             | 20.0 $\pm$ 33.6   |
| 8           | 49.8 $\pm$ 20.0 | 30.4 $\pm$ 9.1  | 16.7 $\pm$ 27.6     | 13.3 $\pm$ 17.1  | 67.3 $\pm$ 154.0              | 28.6 $\pm$ 39.3   |

Note: Data are means  $\pm$  standard deviations.
